# Supplementary material
Source: ML conference proceedings conference paper supplement (https://aclanthology.org/D17-1228)
Supplement: Attachment [file D17-1228.Attachment.zip]

Archive with 8 entries (5 files):
- Supplementary-Material-Steering-Output-Style-and-Topic/
- Supplementary-Material-Steering-Output-Style-and-Topic/bJFK_bNixon_Debate.pdf
- __MACOSX/
- __MACOSX/Supplementary-Material-Steering-Output-Style-and-Topic/
- __MACOSX/Supplementary-Material-Steering-Output-Style-and-Topic/._bJFK_bNixon_Debate.pdf
- Supplementary-Material-Steering-Output-Style-and-Topic/bStarWars_bTrump_bHillary_Debate.pdf
- __MACOSX/Supplementary-Material-Steering-Output-Style-and-Topic/._bStarWars_bTrump_bHillary_Debate.pdf
- __MACOSX/._Supplementary-Material-Steering-Output-Style-and-Topic
